# Supplementary material for: Visual and Physical Degradation of the Black and White Mosaic of a Roman Domus under Palazzo Valentini in Rome: A Preliminary Study
Source: MDPI journal article supplement (doi:10.3390/molecules27227765), 2022-11-11
Supplement: s1 [file s1]

## Supplementary Material

# **Visual and Physical Degradation of the Black and White Mosaic of a *Roman Domus* under Palazzo Valentini in Rome: A Preliminary Study**

Claudia Colantonio <sup>1</sup>, Paola Baldassarri <sup>2</sup>, Pasquale Avino <sup>3,\*</sup>, Maria Luisa Astolfi <sup>1</sup>, Giovanni Visco <sup>1</sup>

<sup>1</sup> Department of Chemistry, University of Rome “La Sapienza”, p.le Aldo Moro 5, I-00185 Rome, Italy

<sup>2</sup> Città Metropolitana di Roma Capitale, U.C. 2, Servizio 3, Palazzo Valentini, Via Quattro Novembre 119a, I-00187 Rome, Italy

<sup>3</sup> Department of Agricultural, Environmental and Food Sciences (DiAAA), University of Molise, Via De Sanctis, I-86100 Campobasso, Italy

<sup>4</sup> CIABC, University of Rome “La Sapienza”, p.le Aldo Moro 5, I-00185 Rome, Italy

\* Correspondence: [avino@unimol.it](mailto:avino@unimol.it)

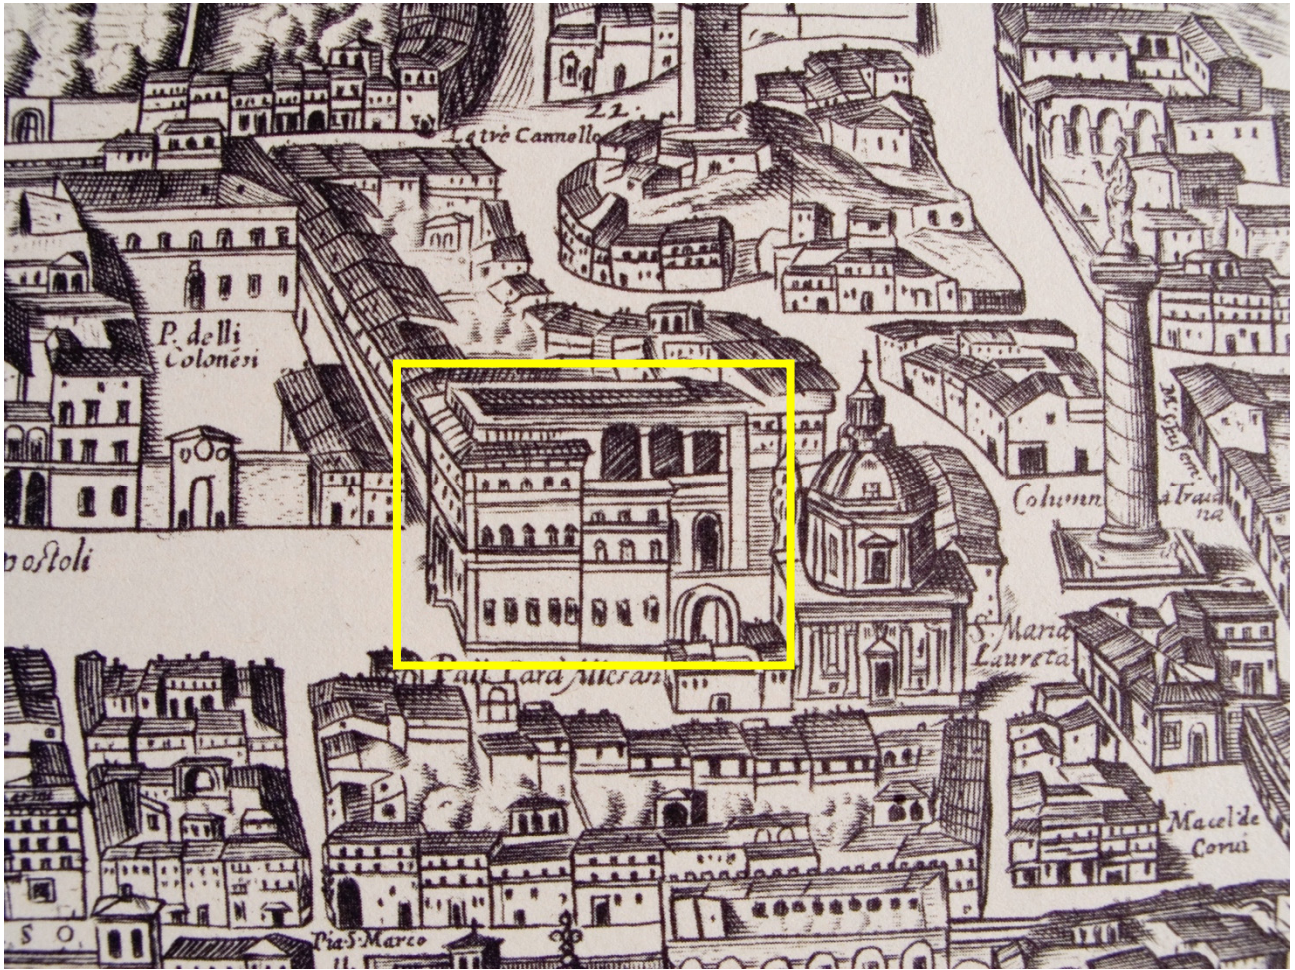

Figure S1. “Veduta di Roma” (1593) by Antonio Tempesta: in the yellow box Palazzo Valentini is highlighted.

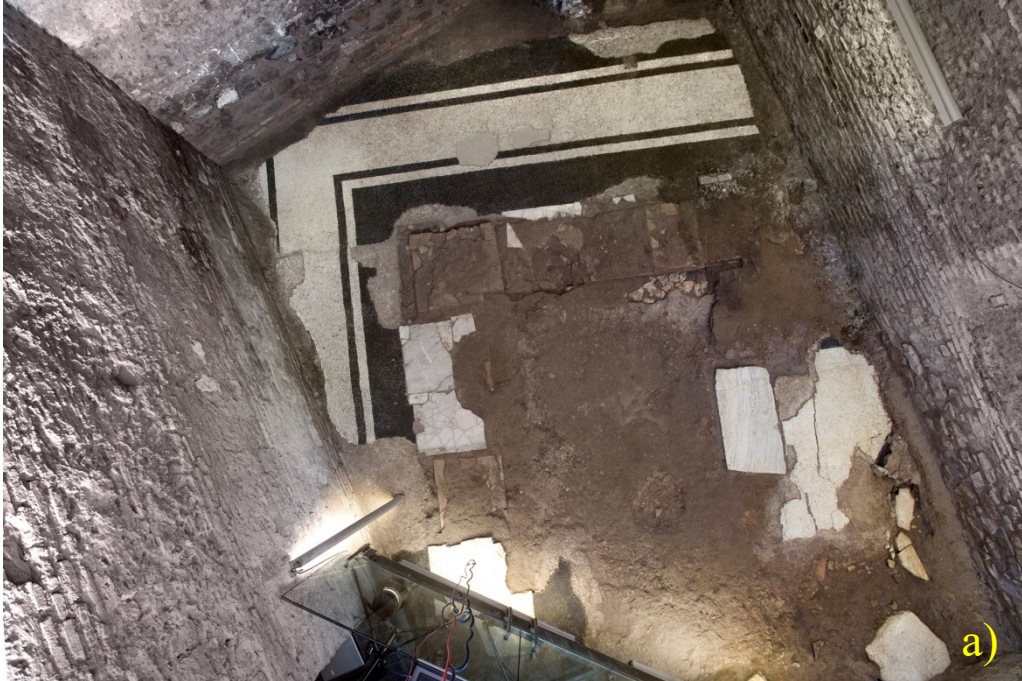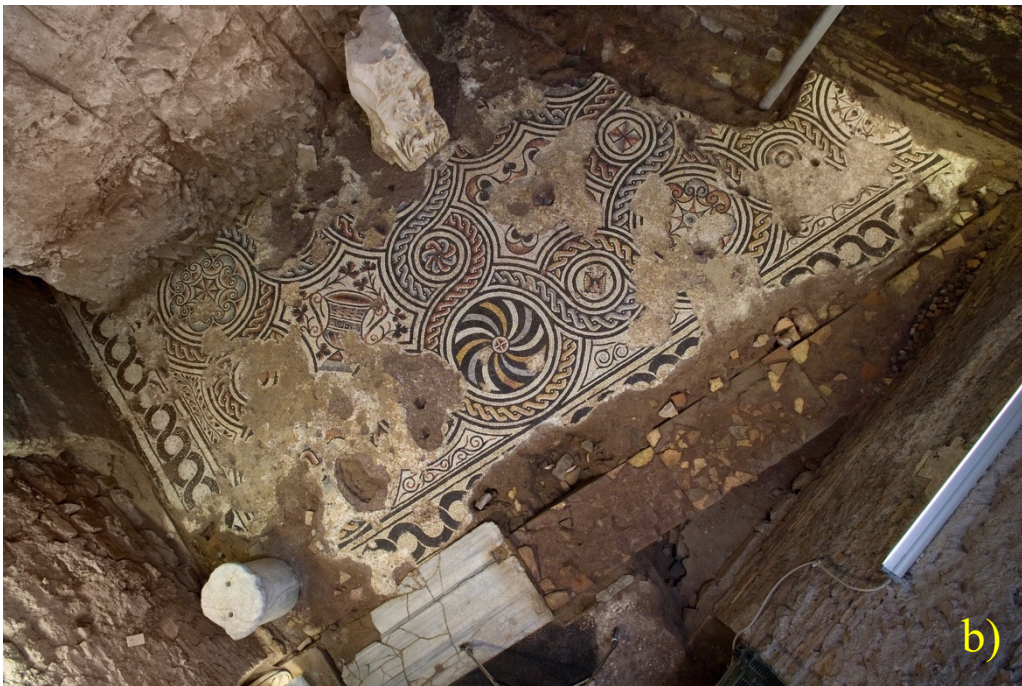

Figure S2. Palazzo Valentini: a) *domus A*: rests of the *peristilium* with black and white mosaic pavement and bases for columns or pilasters; b) *domus A*: *triclinium* with colored geometric mosaic pavement.

SDBS-<sup>1</sup>H NMR SDBS No. 4461HSP-03-643

89.56 MHz

C<sub>8</sub>H<sub>19</sub>N

0.04 ml : 0.5 ml CDCl<sub>3</sub>

### 1-methylheptylamine

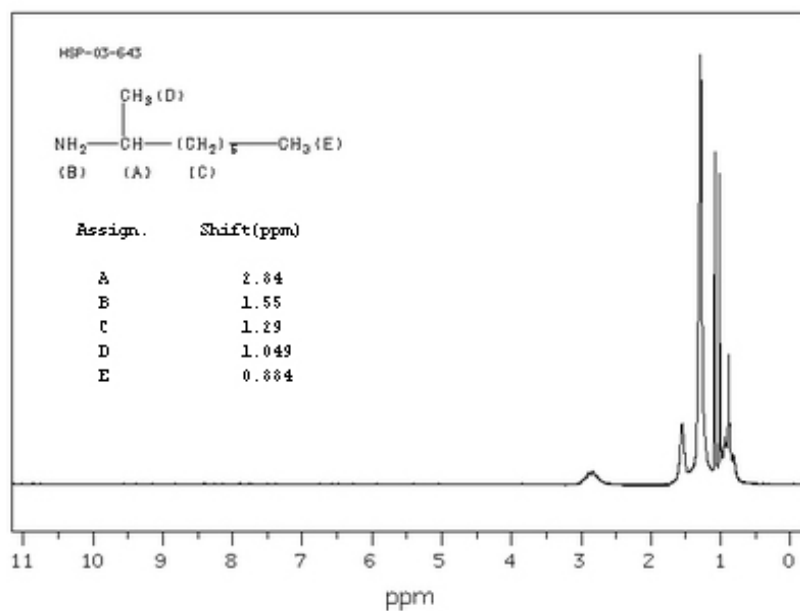

SDBS-<sup>1</sup>H NMR SDBS No. 6055HSP-03-715

89.56 MHz

C<sub>7</sub>H<sub>16</sub>

0.04 ml : 0.5 ml CDCl<sub>3</sub>

### 2-methylhexane

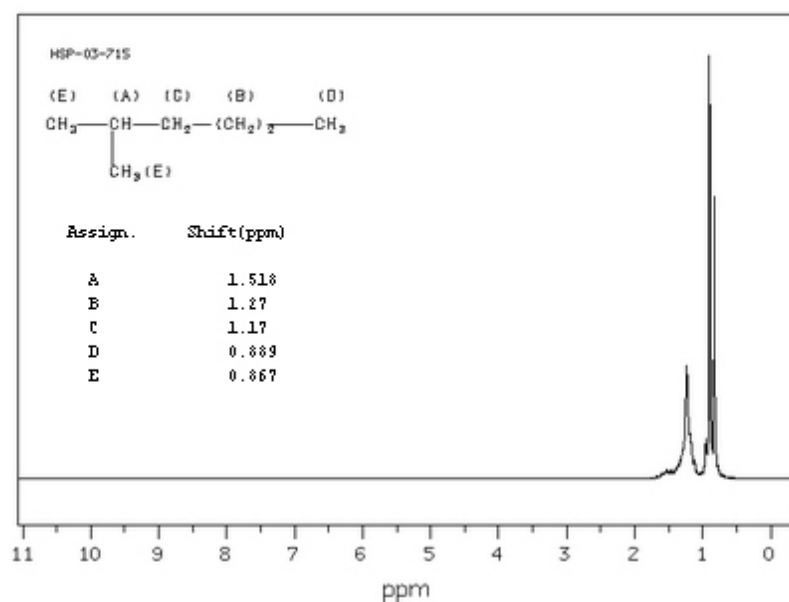

SDBS-<sup>1</sup>H NMRSDBS No. 197HSP-01-976

C<sub>10</sub>H<sub>22</sub>

2-methylnonane

89.56 MHz

0.04 ml : 0.5 ml CDCl<sub>3</sub>

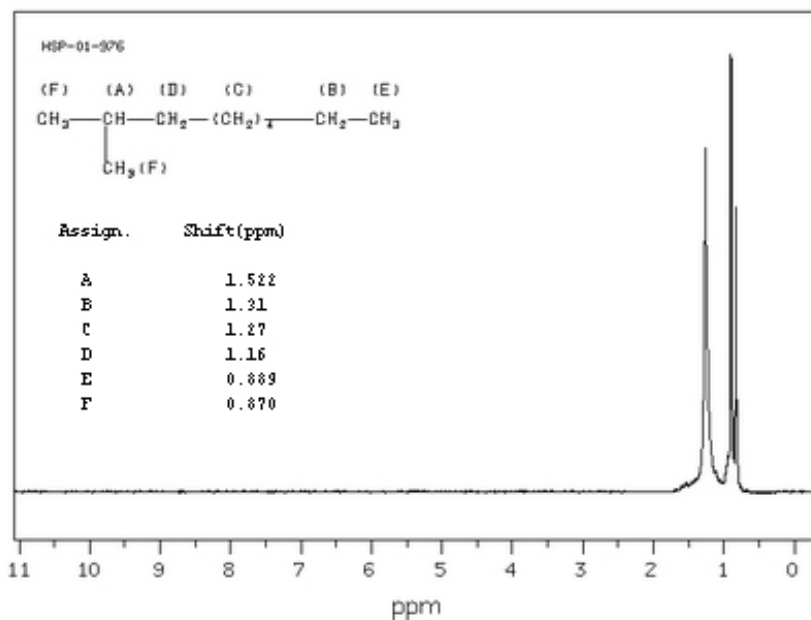

SDBS-<sup>1</sup>H NMRSDBS No. 6866HSP-01-789

C<sub>10</sub>H<sub>23</sub>N

decylamine

89.56 MHz

0.04 ml : 0.5 ml CDCl<sub>3</sub>

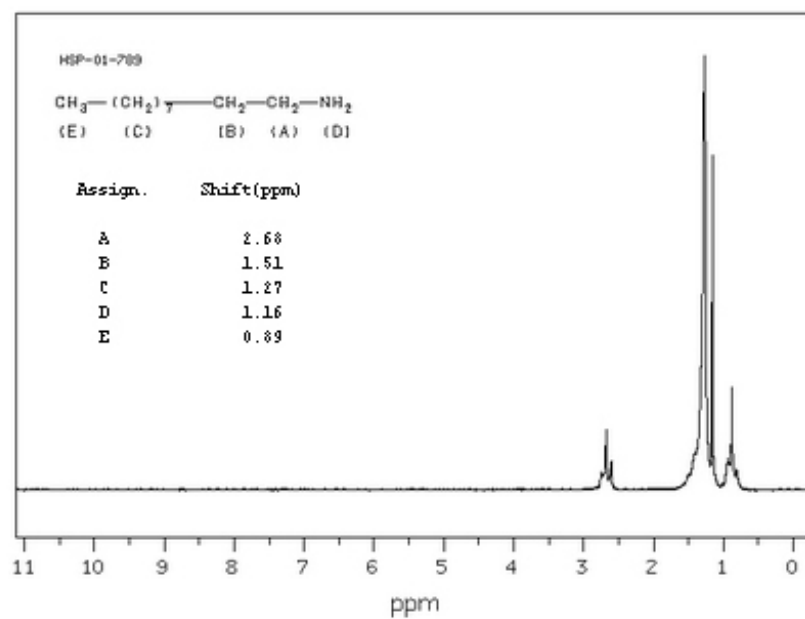

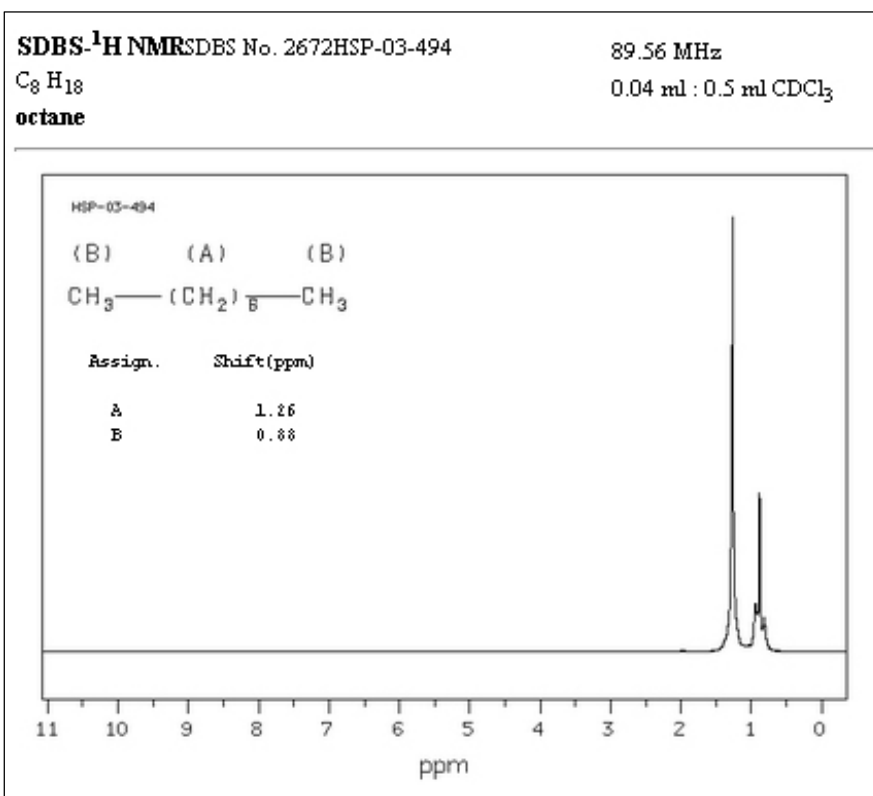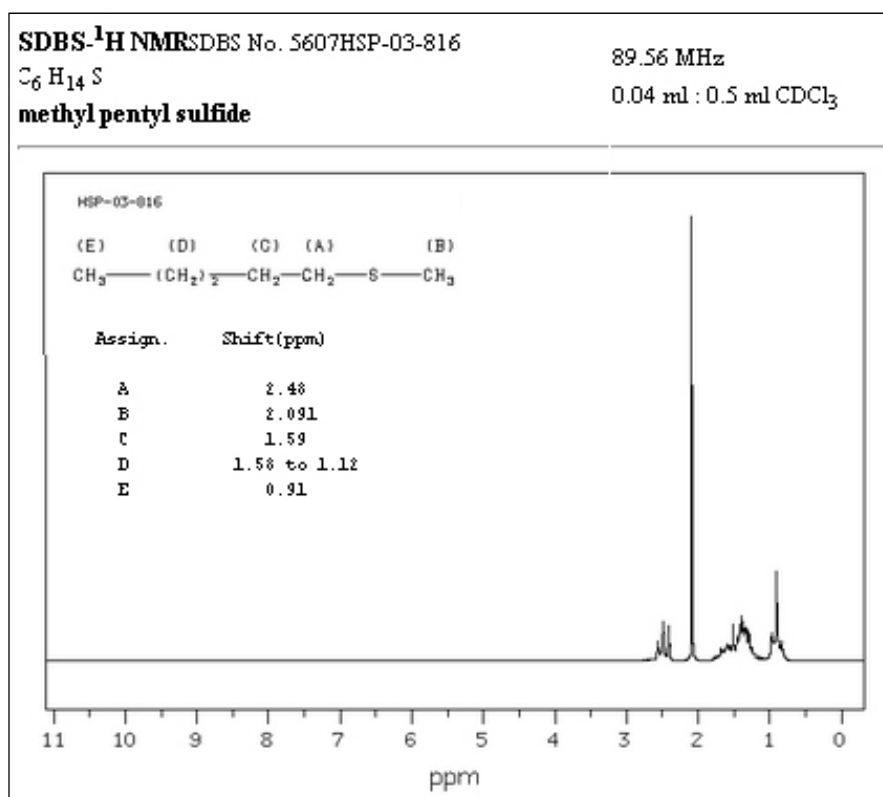

Figure S3. Spectra of the aliphatic hydrocarbons identified in the investigated samples (source: SDBS).

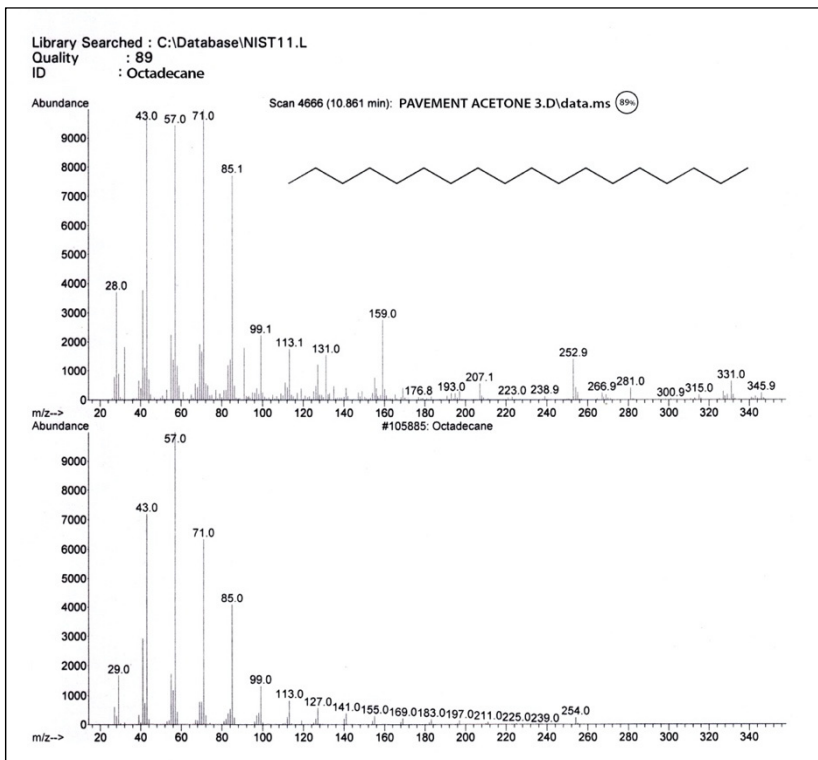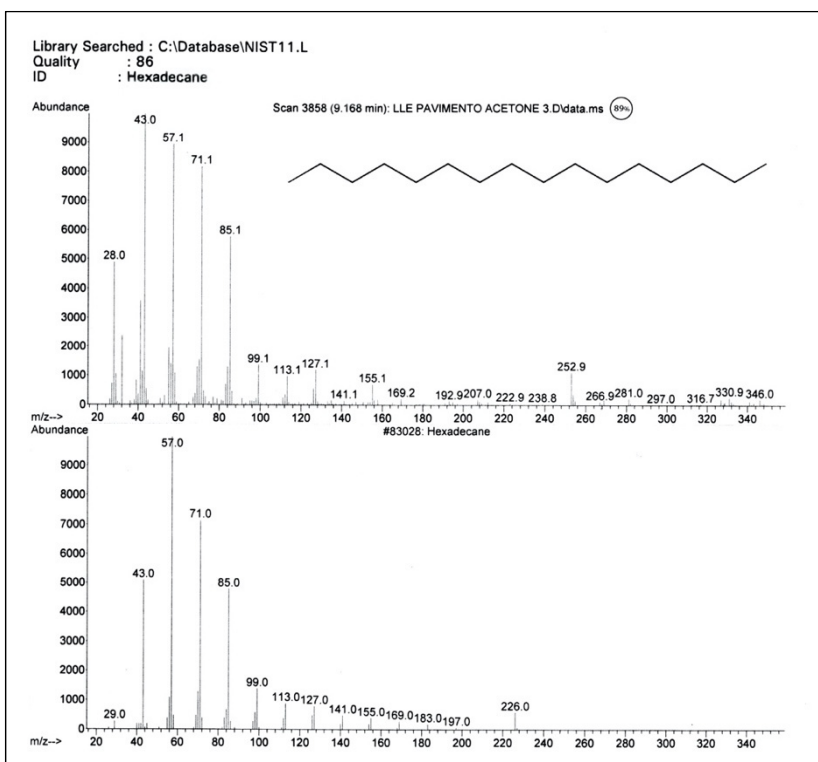

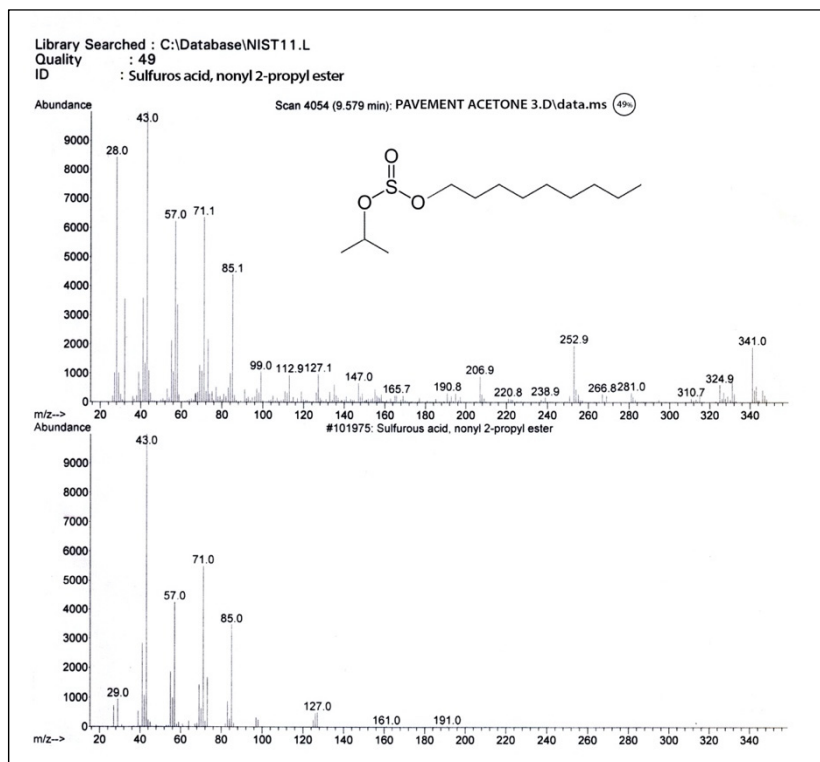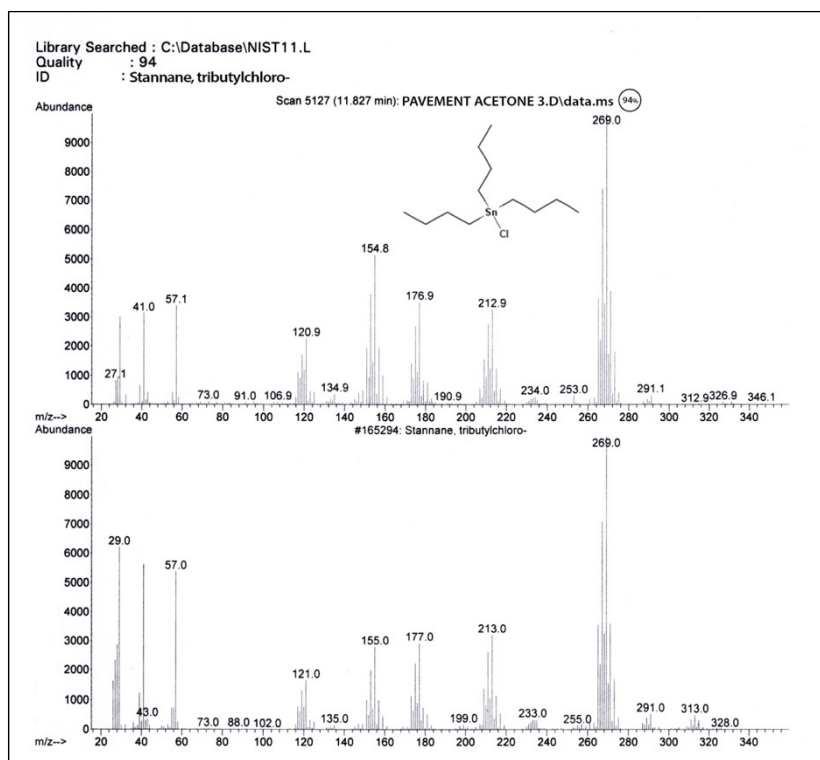

Figure S4. Mass spectra of the compounds (octadecane, hexadecane, nonyl 2-propyl ester sulfurous acid, tributylchloro-stannane) investigated in the floor sample.
